# Supplementary material
Source: PubMed Central journal article supplement (PMC4313399)
Supplement: Supp_Fig1.pdf [file Supp_Fig1.pdf]

## Supplementary Data

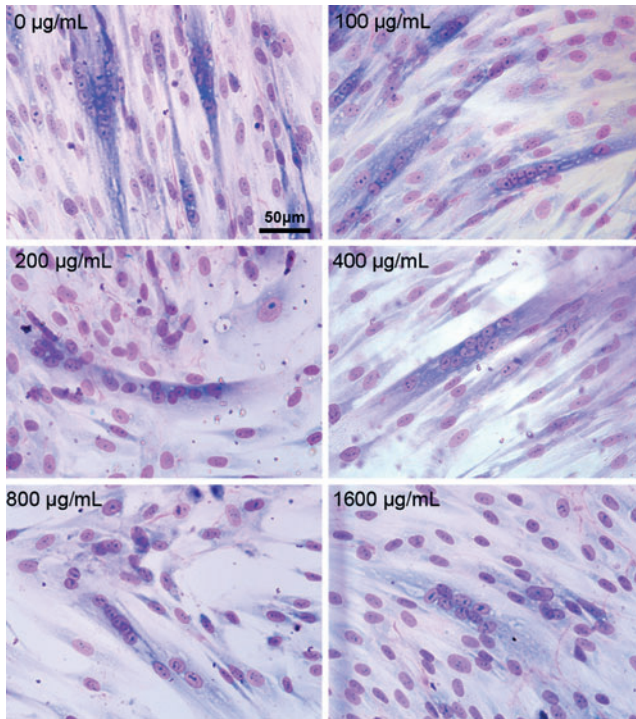

**SUPPLEMENTARY FIG. S1.** Analysis of myogenic differentiation capacity of hMPCs after superparamagnetic iron oxide (SPIO) labeling. hMPCs were treated with SPIO nanoparticles at concentrations of 0–1600 µg/mL and evaluated one passage after SPIO labeling for their differentiation capacity as assessed by fiber formation assay. Scale bar is 50 µm. hMPCs, human muscle precursor cells.
